# Supplementary material
Source: PubMed Central journal article supplement (PMC4752866)

FIGURE S1

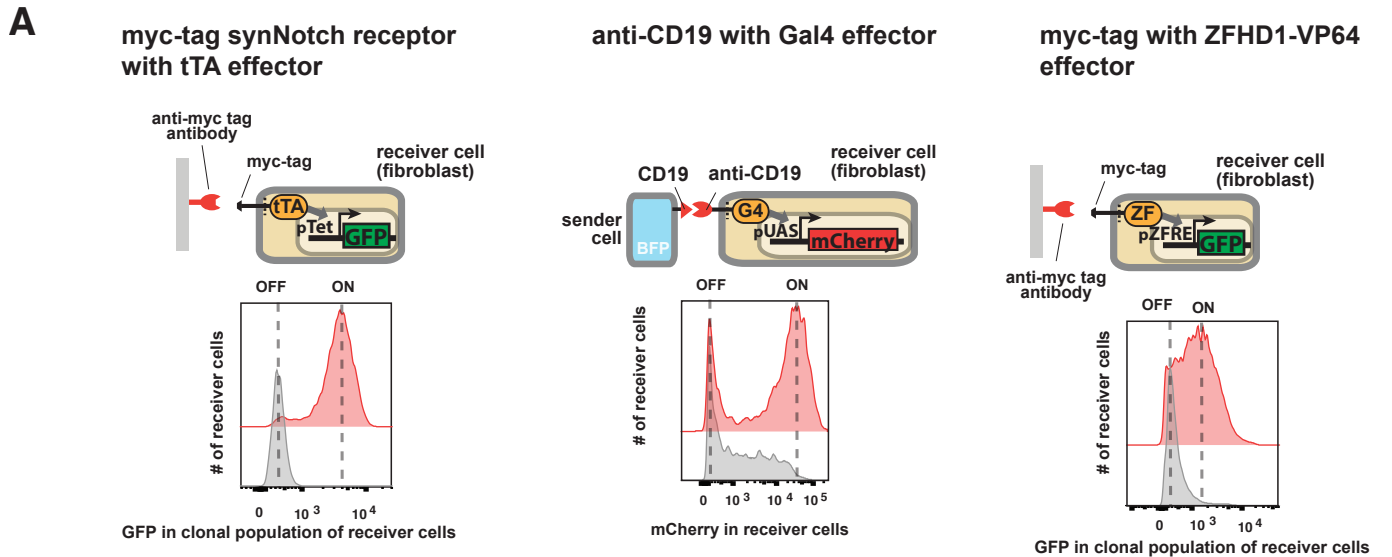

**anti-GFP nanobody with tTA effector**

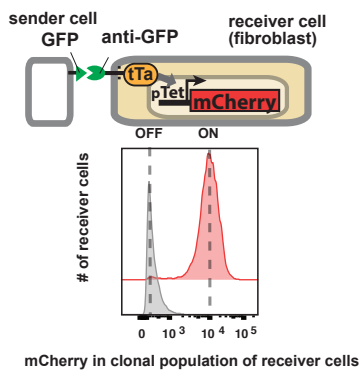

**anti-CD19 with tTA effector**

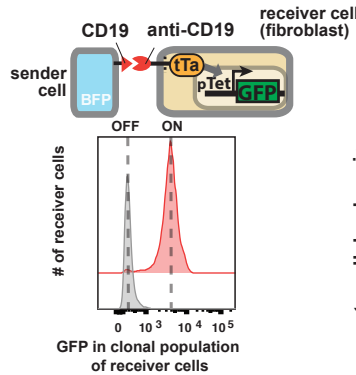

**functional domain combinations**

| extracellular domain | intracellular domain |     |            |           |
|----------------------|----------------------|-----|------------|-----------|
|                      | Gal4-VP64            | tTA | ZFHD1-VP64 | Gal4-KRAB |
| myc-tag              |                      |     |            |           |
| anti-CD19            |                      |     |            |           |
| anti-GFP             |                      |     |            |           |

**B** Addition of EGF repeat(s) can reduce the basal activation

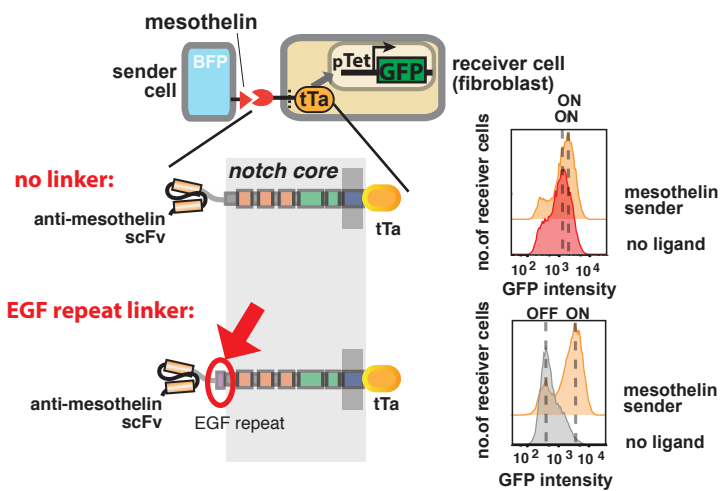

**C** Reporter induction is proportional to synNotch expression levels

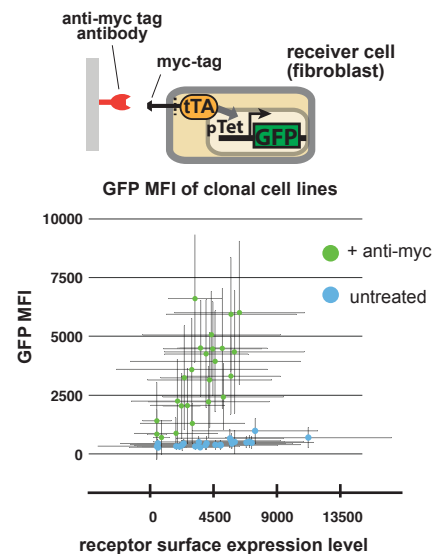

Supplement: NIHMS751441-supplement-2.pdf [file NIHMS751441-supplement-2.pdf]
