# Supplementary material
Source: PubMed Central journal article supplement (PMC4752866)

FIGURE S2

**A** Graded transcriptional response to increasing amount of input

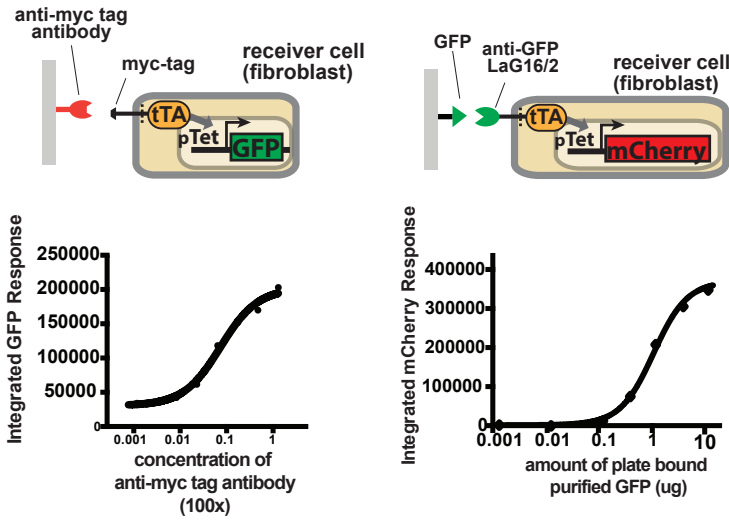

**B** Time course of reporter activation and deactivation

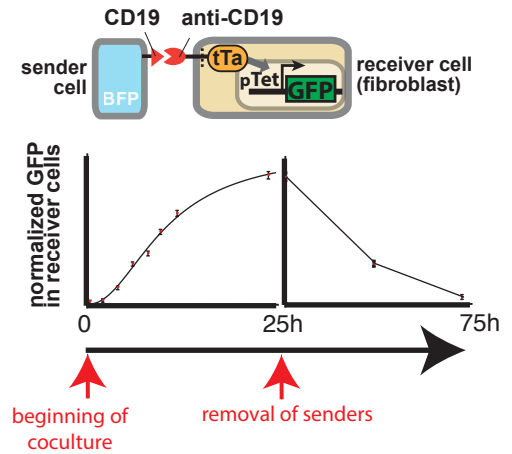

**C** Pulses of activation

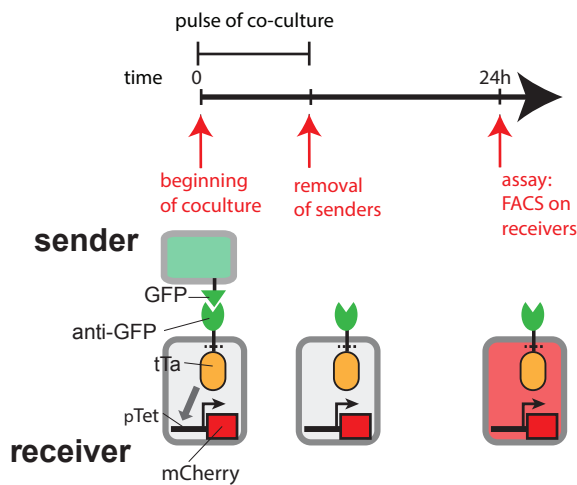

**D** anti-CD19 synNotch CIS-inhibition

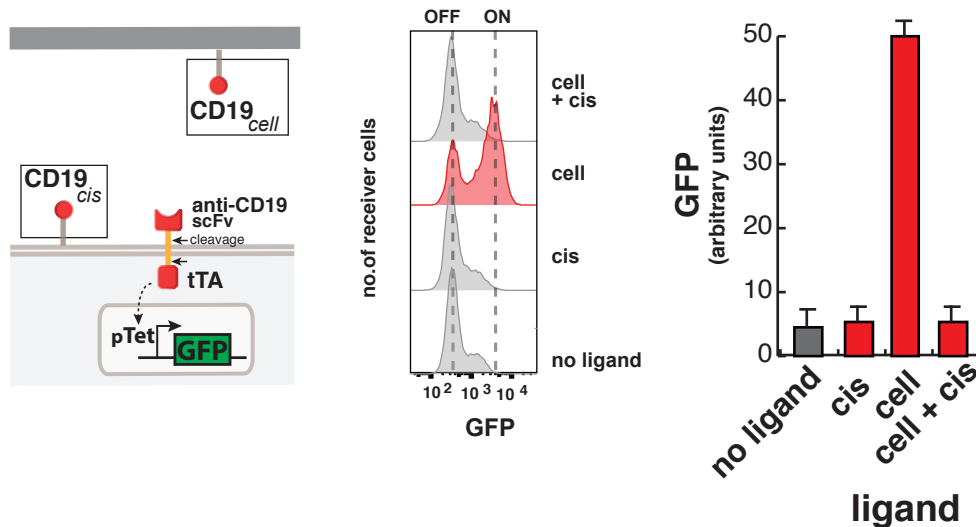

Supplement: NIHMS751441-supplement-3.pdf [file NIHMS751441-supplement-3.pdf]
