# Supplementary material
Source: PubMed Central journal article supplement (PMC4752866)

FIGURE S4

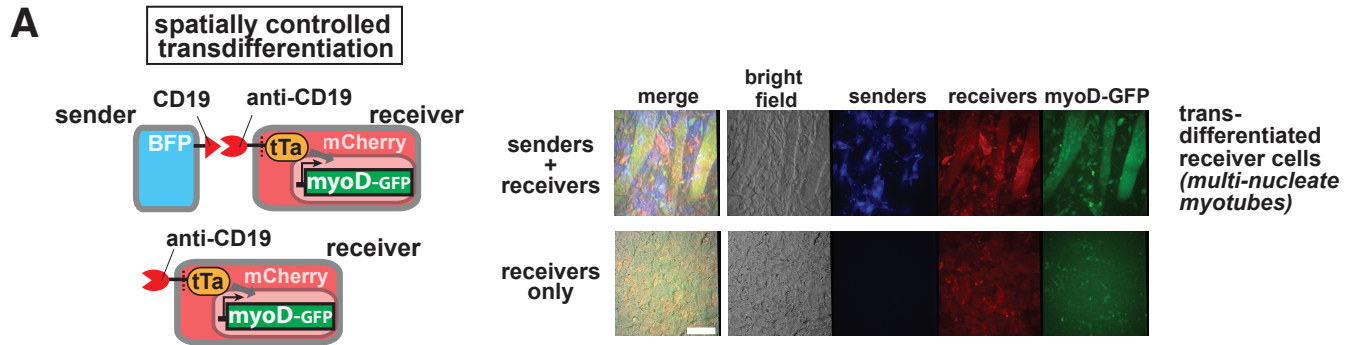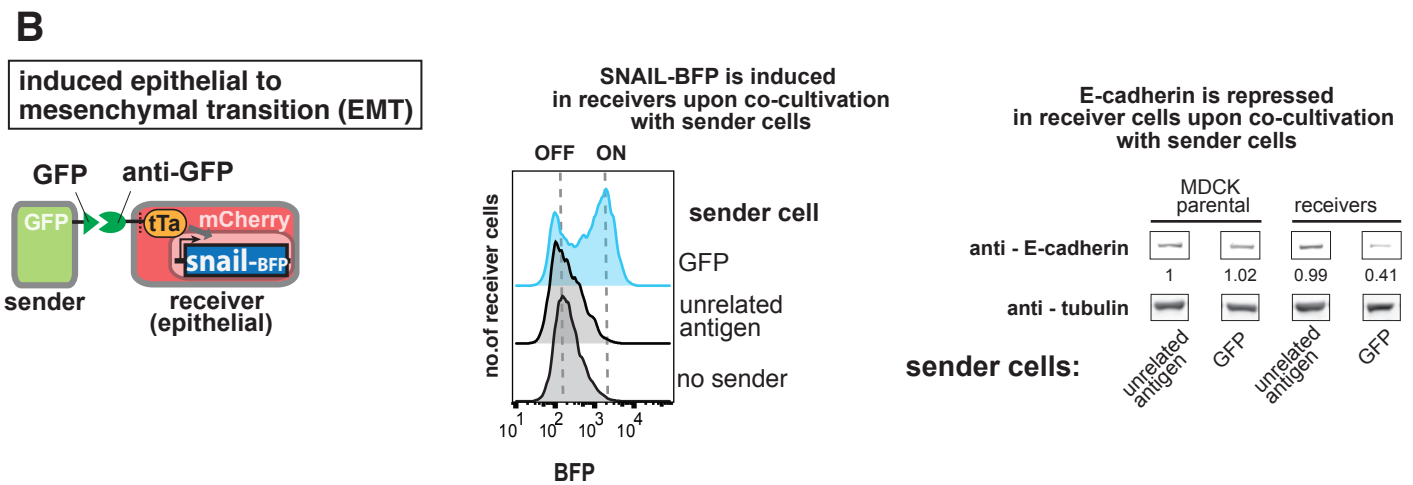

Supplement: NIHMS751441-supplement-5.pdf [file NIHMS751441-supplement-5.pdf]

FIGURE S5

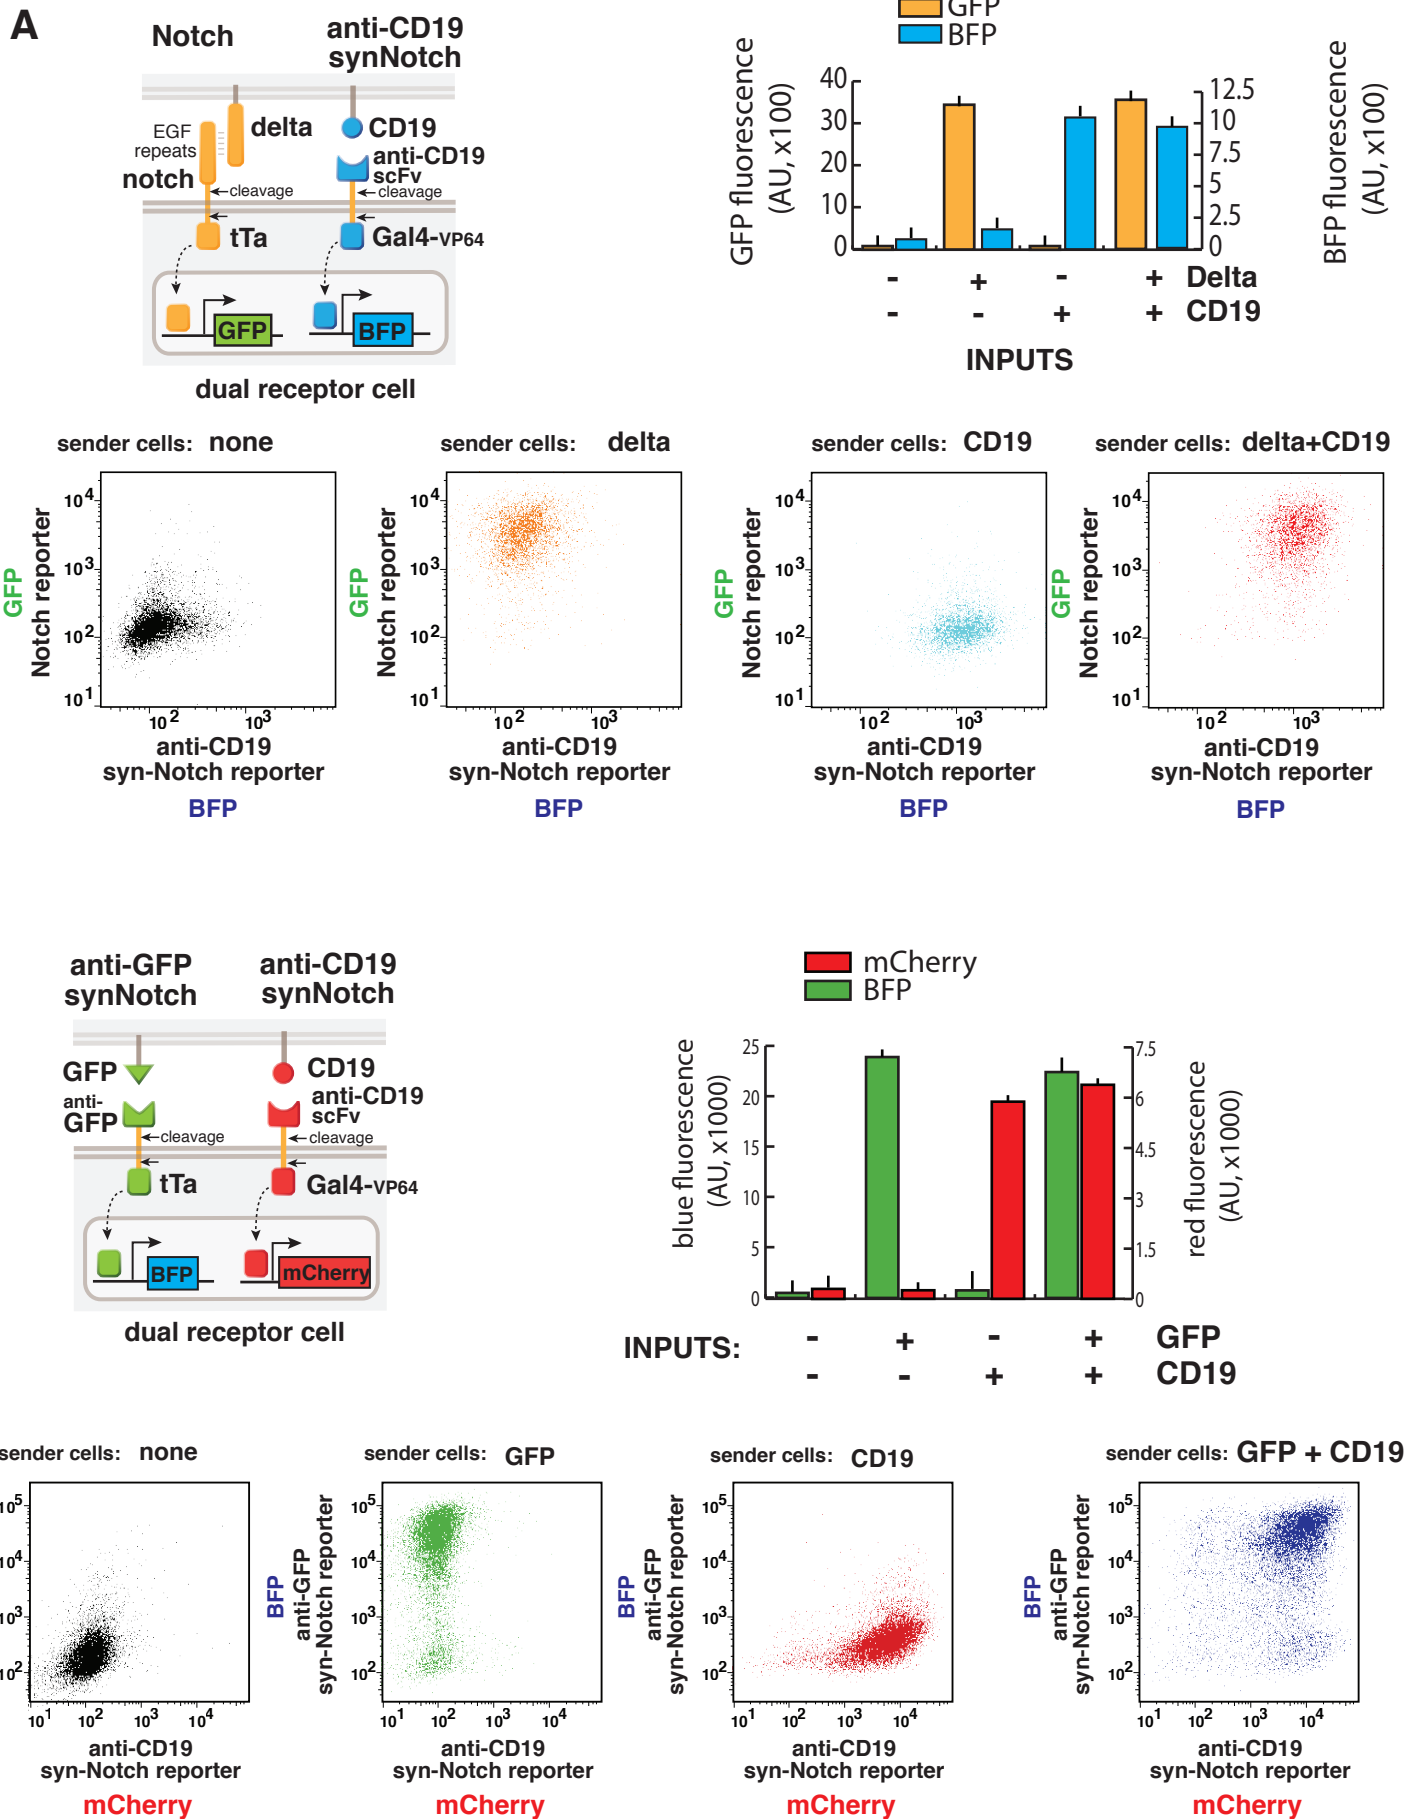

Supplement: NIHMS751441-supplement-6.pdf [file NIHMS751441-supplement-6.pdf]
